# Supplementary material
Source: PubMed Central journal article supplement (PMC8732285)
Supplement: mmc1.pdf [file mmc1.pdf]

# THE LANCET

## Healthy Longevity

### Supplementary appendix

This appendix formed part of the original submission and has been peer reviewed. We post it as supplied by the authors.

Supplement to: Krutikov M, Palmer T, Tut G, et al. Prevalence and duration of detectable SARS-CoV-2 nucleocapsid antibodies in staff and residents of long-term care facilities over the first year of the pandemic (VIVALDI study): prospective cohort study in England. *Lancet Healthy Longev* 2021; published online Dec 16. [https://doi.org/10.1016/S2666-7568\(21\)00282-8](https://doi.org/10.1016/S2666-7568(21)00282-8).

## Supplementary appendix: Prevalence and duration of detectable SARS-CoV-2 nucleocapsid antibody in staff and residents of Long Term Care Facilities over the first year of the pandemic (VIVALDI study): prospective cohort study in England

|                                                                                                                                                                                                                                                   |   |
|---------------------------------------------------------------------------------------------------------------------------------------------------------------------------------------------------------------------------------------------------|---|
| Figure S1: study inclusion flow diagram .....                                                                                                                                                                                                     | 1 |
| Figure S2: Changes in LTCF weighted seroprevalence over successive sampling rounds according to ‘baseline’ LTCF seroprevalence in round 1 (n=201) .....                                                                                           | 2 |
| Figure S3: Kaplan Meier plot of time to antibody loss from estimated date of seroconversion according to severity of primary infection (hospital admission vs no hospital admission) in person-days with number censored and number at risk ..... | 3 |
| Figure S4: Kaplan Meier plot of time to antibody loss from estimated date of seroconversion in PCR-confirmed, hospitalised and seroconverted participants, with number censored and number at risk (n=116).....                                   | 4 |
| Table S1: Characteristics of included LTCFs .....                                                                                                                                                                                                 | 5 |
| Table S2: Number of samples included in the analysis by care home role and mean time between samples in days .....                                                                                                                                | 5 |
| Table S3: Antibody results by round of testing and round 1 antibody result in a) staff b) residents .....                                                                                                                                         | 6 |
| Table S4: Distribution of time to sero-reversion for residents and staff (n=188)* .....                                                                                                                                                           | 6 |
| Table S5: Time at risk and incidence rate of sero-reversion by care home role in person-days .....                                                                                                                                                | 6 |
| Table S6: Time at risk and incidence rate of sero-reversion according to severity of primary infection .....                                                                                                                                      | 6 |
| Table S7: Time at risk and incidence rate of sero-reversion in sub-group of PCR-confirmed, hospitalised or sero-converted individuals only (sensitivity analysis) (n=116) .....                                                                   | 6 |
| STROBE checklist .....                                                                                                                                                                                                                            | 7 |

Figure S1: study inclusion flow diagram



Figure S2: Changes in LTCF weighted seroprevalence over successive sampling rounds according to 'baseline' LTCF seroprevalence in round 1 (n=201)



**Figure S3: Kaplan Meier plot of time to antibody loss from estimated date of seroconversion according to severity of primary infection (hospital admission vs no hospital admission) in person-days with number censored and number at risk**



|                                 |            | Number at risk (number censored) |             |          |             |           |         |        |       |
|---------------------------------|------------|----------------------------------|-------------|----------|-------------|-----------|---------|--------|-------|
| Time from seroconversion (days) | 0          | 50                               | 100         | 150      | 200         | 250       | 300     | 350    | 400   |
| Admitted                        | 20<br>(0)  | 20 (0)                           | 17<br>(3)   | 12 (3)   | 6 (6)       | 4 (1)     | 3 (0)   | 2 (1)  | 0 (2) |
| Not admitted                    | 599<br>(0) | 585<br>(13)                      | 473<br>(58) | 293 (90) | 58<br>(216) | 40<br>(3) | 21 (14) | 5 (16) | 0 (5) |

**Figure S4: Kaplan Meier plot of time to antibody loss from estimated date of seroconversion in PCR-confirmed, hospitalised and seroconverted participants, with number censored and number at risk (n=116)**



| Time from seroconversion (days) | Number at risk (number censored) |        |            |        |         |           |       |       |       |
|---------------------------------|----------------------------------|--------|------------|--------|---------|-----------|-------|-------|-------|
|                                 | 0                                | 50     | 100        | 150    | 200     | 250       | 300   | 350   | 400   |
| Staff                           | 43<br>(0)                        | 35 (7) | 6<br>(25)  | 4 (2)  | 0 (4)   | 0 (0)     | 0 (0) | 0 (0) | 0 (0) |
| Residents                       | 73<br>(0)                        | 67 (6) | 41<br>(26) | 33 (5) | 17 (15) | 11<br>(1) | 4 (6) | 1 (3) | 0 (1) |

**Table S1: Characteristics of included LTCFs**

|                                                  | Number of LTCFs (%) |
|--------------------------------------------------|---------------------|
| Total                                            | 201                 |
| Proportion where residents sampled               | 176 (87.6)          |
| Proportion where staff sampled                   | 201 (100)           |
| Region                                           |                     |
| London                                           | 10 (5.0)            |
| South East                                       | 40 (19.9)           |
| East of England                                  | 13 (6.5)            |
| East Midlands                                    | 26 (12.9)           |
| West Midlands                                    | 10 (5.0)            |
| South West                                       | 39 (19.4)           |
| North West                                       | 29 (14.4)           |
| North East                                       | 20 (10.0)           |
| Yorkshire & Humber                               | 14 (7.0)            |
| LTCF type                                        |                     |
| For-profit chain                                 | 118 (58.7)          |
| Not for Profit chain                             | 64 (31.8)           |
| Independent                                      | 19 (9.5)            |
| Round of testing                                 |                     |
| 1                                                | 201 (100)           |
| 2                                                | 175 (87.1)          |
| 3                                                | 84 (41.8)           |
| 4                                                | 39 (19.4)           |
| Interval                                         |                     |
| 1: June-July 2020                                | 96 (19.6)           |
| 2: August-September 2020                         | 94 (19.2)           |
| 3: October-November 2020                         | 87 (17.8)           |
| 4: December 2020-January 2021                    | 53 (10.8)           |
| 5: February 2021                                 | 59 (12.0)           |
| 6: March-April 2021                              | 101 (20.6)          |
| Occupied beds per LTCF, mean (SD)                | 44.36 (16.5)        |
| Number of staff per LTCF, mean (SD)              | 56.86 (21.9)        |
| Number of samples per LTCF per round, mean (SD): |                     |
| Staff                                            | 13.18 (8.61)        |
| Residents                                        | 7.60 (6.05)         |

**Table S2: Number of samples included in the analysis by care home role and mean time between samples in days**

| Testing round | Number of Residents with antibodies to N (%) | Number of Staff with antibodies to N (%) | Mean time to next sample in days (SD) |
|---------------|----------------------------------------------|------------------------------------------|---------------------------------------|
| 1             | 239/239 (100)                                | 377/380 (99.2)                           | 62.5 (26.9)                           |
| 2             | 211/239 (88.3)                               | 303/380 (79.7)                           | 61.8 (24.0)                           |
| 3             | 119/154 (77.3)                               | 140/218 (64.2)                           | 157.2 (24.9)                          |
| 4             | 23/37 (62.2)                                 | 8/18 (44.4)                              | NA                                    |

NA = Not Applicable

**Table S3: Antibody results by round of testing and round 1 antibody result in a) staff b) residents**

a)

|         |              | Round 2      |              |       | Round 3      |              |       | Round 4      |              |       |
|---------|--------------|--------------|--------------|-------|--------------|--------------|-------|--------------|--------------|-------|
|         |              | Positive (%) | Negative (%) | Total | Positive (%) | Negative (%) | Total | Positive (%) | Negative (%) | Total |
| Round 1 | Positive (%) | 300 (79.6)   | 77 (20.4)    | 377   | 137 (63.7)   | 78 (36.3)    | 215   | 7 (41.2)     | 10 (58.8)    | 17    |
|         | Negative (%) | 3 (100)      | 0 (0)        | 3     | 3 (100)      | 0 (0)        | 3     | 1 (100)      | 0 (0)        | 1     |
| Total   |              | 303          | 77           | 380   | 140          | 78           | 218   | 8            | 10           | 18    |

b)

|         |              | Round 2      |              |       | Round 3      |              |       | Round 4      |              |       |
|---------|--------------|--------------|--------------|-------|--------------|--------------|-------|--------------|--------------|-------|
|         |              | Positive (%) | Negative (%) | Total | Positive (%) | Negative (%) | Total | Positive (%) | Negative (%) | Total |
| Round 1 | Positive (%) | 211 (88.3)   | 28 (11.7)    | 239   | 119 (77.3)   | 35 (22.7)    | 154   | 23 (62.2)    | 14 (37.8)    | 37    |
|         | Negative (%) | 0            | 0            | 0     | 0            | 0            | 0     | 0            | 0            | 0     |
| Total   |              | 211          | 28           | 239   | 119          | 35           | 154   | 23           | 14           | 37    |

**Table S4: Distribution of time to sero-reversion for residents and staff (n=188)\***

| Time to sero-reversion | Residents (%) | Staff (%) | Total (%)  |
|------------------------|---------------|-----------|------------|
| < 90 days              | 13 (23.6)     | 23 (17.3) | 36 (19.2)  |
| 90-180 days            | 30 (54.6)     | 99 (74.4) | 129 (68.6) |
| 180-270 days           | 11 (20.0)     | 8 (6.0)   | 19 (10.1)  |
| ≥ 270 days             | 1 (1.8)       | 3 (2.3)   | 4 (2.1)    |
| Total                  | 55            | 133       | 188        |

\* Among those that sero-reverted, those who did not (censored) are excluded

**Table S5: Time at risk and incidence rate of sero-reversion by care home role in person-days**

| Role      | Number of sero-reversions | Time at risk (person-days) | Incidence rate (per 1000 person-days) |
|-----------|---------------------------|----------------------------|---------------------------------------|
| Staff     | 133                       | 54543                      | 2.44                                  |
| Residents | 55                        | 37141                      | 1.48                                  |
| Overall   | 188                       | 91684                      | 2.05                                  |

**Table S6: Time at risk and incidence rate of sero-reversion according to severity of primary infection**

| Severity of infection    | Number of sero-reversions | Time at risk (person-days) | Incidence rate (per 1000 person-days) |
|--------------------------|---------------------------|----------------------------|---------------------------------------|
| Admitted to hospital     | 4                         | 3639                       | 1.10                                  |
| Not admitted to hospital | 184                       | 88045                      | 2.09                                  |

**Table S7: Time at risk and incidence rate of sero-reversion in sub-group of PCR-confirmed, hospitalised or sero-converted individuals only (sensitivity analysis) (n=116)**

| Severity of infection | Number of sero-reversions | Time at risk (person-days) | Incidence rate (per 1000 person-days) |
|-----------------------|---------------------------|----------------------------|---------------------------------------|
| Staff                 | 5                         | 3369                       | 1.48                                  |
| Residents             | 10                        | 10756                      | 0.93                                  |
| Overall               | 15                        | 14126                      | 1.06                                  |

## STROBE checklist

|                           | Item No | Recommendation                                                                                                                                                                                                                                                                                                                                                                                                                                                         | Page No        |
|---------------------------|---------|------------------------------------------------------------------------------------------------------------------------------------------------------------------------------------------------------------------------------------------------------------------------------------------------------------------------------------------------------------------------------------------------------------------------------------------------------------------------|----------------|
| Title and abstract        |         |                                                                                                                                                                                                                                                                                                                                                                                                                                                                        |                |
|                           | 1       | (a) Indicate the study's design with a commonly used term in the title or the abstract                                                                                                                                                                                                                                                                                                                                                                                 | 1              |
|                           |         | (b) Provide in the abstract an informative and balanced summary of what was done and what was found                                                                                                                                                                                                                                                                                                                                                                    | 2              |
| Introduction              |         |                                                                                                                                                                                                                                                                                                                                                                                                                                                                        |                |
| Background/rationale      | 2       | Explain the scientific background and rationale for the investigation being reported                                                                                                                                                                                                                                                                                                                                                                                   | 4              |
| Objectives                | 3       | State specific objectives, including any prespecified hypotheses                                                                                                                                                                                                                                                                                                                                                                                                       | 4              |
| Methods                   |         |                                                                                                                                                                                                                                                                                                                                                                                                                                                                        |                |
| Study design              | 4       | Present key elements of study design early in the paper                                                                                                                                                                                                                                                                                                                                                                                                                | 4-5            |
| Setting                   | 5       | Describe the setting, locations, and relevant dates, including periods of recruitment, exposure, follow-up, and data collection                                                                                                                                                                                                                                                                                                                                        | 4-5            |
| Participants              | 6       | (a) <i>Cohort study?</i> Give the eligibility criteria, and the sources and methods of selection of participants. Describe methods of follow-up<br><i>Case-control study?</i> Give the eligibility criteria, and the sources and methods of case ascertainment and control selection. Give the rationale for the choice of cases and controls<br><i>Cross sectional study?</i> Give the eligibility criteria, and the sources and methods of selection of participants | 4-6            |
|                           |         | (b) <i>Cohort study?</i> For matched studies, give matching criteria and number of exposed and unexposed<br><i>Case-control study?</i> For matched studies, give matching criteria and the number of controls per case                                                                                                                                                                                                                                                 | n/a            |
| Variables                 | 7       | Clearly define all outcomes, exposures, predictors, potential confounders, and effect modifiers. Give diagnostic criteria, if applicable                                                                                                                                                                                                                                                                                                                               | 5-7            |
| Data sources/ measurement | 8*      | For each variable of interest, give sources of data and details of methods of assessment (measurement). Describe comparability of assessment methods if there is more than one group                                                                                                                                                                                                                                                                                   | 5-7            |
| Bias                      | 9       | Describe any efforts to address potential sources of bias                                                                                                                                                                                                                                                                                                                                                                                                              | 4-7            |
| Study size                | 10      | Explain how the study size was arrived at                                                                                                                                                                                                                                                                                                                                                                                                                              | 7              |
| Quantitative variables    | 11      | Explain how quantitative variables were handled in the analyses. If applicable, describe which groupings were chosen and why                                                                                                                                                                                                                                                                                                                                           | 6-7            |
| Statistical methods       | 12      | (a) Describe all statistical methods, including those used to control for confounding                                                                                                                                                                                                                                                                                                                                                                                  | 6-7            |
|                           |         | (b) Describe any methods used to examine subgroups and interactions                                                                                                                                                                                                                                                                                                                                                                                                    | 6-7            |
|                           |         | (c) Explain how missing data were addressed                                                                                                                                                                                                                                                                                                                                                                                                                            | 5-7            |
|                           |         | (d) <i>Cohort study?</i> If applicable, explain how loss to follow-up was addressed<br><i>Case-control study?</i> If applicable, explain how matching of cases and controls was addressed<br><i>Cross sectional study?</i> If applicable, describe analytical methods taking account of sampling strategy                                                                                                                                                              | 5-7            |
|                           |         | (e) Describe any sensitivity analyses                                                                                                                                                                                                                                                                                                                                                                                                                                  | n/a            |
| Results                   |         |                                                                                                                                                                                                                                                                                                                                                                                                                                                                        |                |
| Participants              | 13*     | (a) Report numbers of individuals at each stage of study? eg numbers potentially eligible, examined for eligibility, confirmed eligible, included in the study, completing follow-up, and analysed                                                                                                                                                                                                                                                                     | 7-9, figure S1 |
|                           |         | (b) Give reasons for non-participation at each stage                                                                                                                                                                                                                                                                                                                                                                                                                   | 7-9 Figure S1  |

|                   | Item No | Recommendation                                                                                                                                                                                             | Page No                  |
|-------------------|---------|------------------------------------------------------------------------------------------------------------------------------------------------------------------------------------------------------------|--------------------------|
|                   |         | (c) Consider use of a flow diagram                                                                                                                                                                         | Figure S1 (appendix)     |
| Descriptive data  | 14*     | (a) Give characteristics of study participants (eg demographic, clinical, social) and information on exposures and potential confounders                                                                   | 7-9, table 1, appendix   |
|                   |         | (b) Indicate number of participants with missing data for each variable of interest                                                                                                                        | 7-9                      |
|                   |         | (c) <i>Cohort study?</i> Summarise follow-up time (eg average and total amount)                                                                                                                            | 7-9                      |
| Outcome data      | 15*     | <i>Cohort study?</i> Report numbers of outcome events or summary measures over time                                                                                                                        | 7-9, table 1-2, appendix |
|                   |         | <i>Case-control study?</i> Report numbers in each exposure category, or summary measures of exposure                                                                                                       |                          |
|                   |         | <i>Cross sectional study?</i> Report numbers of outcome events or summary measures                                                                                                                         |                          |
| Main results      | 16      | (a) Report the numbers of individuals at each stage of the study? eg numbers potentially eligible, examined for eligibility, confirmed eligible, included in the study, completing follow-up, and analysed | 7-9, appendix, table 1-2 |
|                   |         | (b) Give reasons for non-participation at each stage                                                                                                                                                       | 7-9, appendix            |
|                   |         | (c) Consider use of a flow diagram                                                                                                                                                                         |                          |
| Other analyses    | 17      | Report other analyses done? eg analyses of subgroups and interactions, and sensitivity analyses                                                                                                            | 8-9, appendix            |
| Discussion        |         |                                                                                                                                                                                                            |                          |
| Key results       | 18      | Summarise key results with reference to study objectives                                                                                                                                                   | 9-11                     |
| Limitations       | 19      | Discuss limitations of the study, taking into account sources of potential bias or imprecision. Discuss both direction and magnitude of any potential bias                                                 | 9-11                     |
| Interpretation    | 20      | Give a cautious overall interpretation of results considering objectives, limitations, multiplicity of analyses, results from similar studies, and other relevant evidence                                 | 9-11                     |
| Generalisability  | 21      | Discuss the generalisability (external validity) of the study results                                                                                                                                      | 9-11                     |
| Other information |         |                                                                                                                                                                                                            |                          |
| Funding           | 22      | Give the source of funding and the role of the funders for the present study and, if applicable, for the original study on which the present article is based                                              | 7                        |
